# Supplementary material for: As and Sb are more labile and toxic to water spinach (Ipomoea aquatica) in recently contaminated soils than historically co-contaminated soils
Source: Royal Society of Chemistry journal article supplement (doi:10.1039/c8em00057c), 2018-01-01
Supplement: c8em00057c1.pdf [file c8em00057c1.pdf]

## Supplementary Information

### Arsenic and antimony lability in recently and historically contaminated soils and its effects on water spinach (*Ipomoea aquatica*)

Supplementary Information 1

**Table S1.** Nominal and final measured concentrations obtained by total soil acid digestion in historically and recently contaminated bioassay soils (mean  $\pm$  SD,  $n \geq 3$ ).

| Nominal concentration                          | Total soil metal concentration |                | Metalloids accumulated in edible parts mg/kg (dry mass) |                |                 |                 |
|------------------------------------------------|--------------------------------|----------------|---------------------------------------------------------|----------------|-----------------|-----------------|
|                                                | As                             | Sb             | As                                                      | Sb             | As              |                 |
| <b>Historically contaminated soils (mg/kg)</b> |                                |                |                                                         |                |                 |                 |
|                                                | <b>Sb</b>                      | <b>As</b>      | <b>Sb</b>                                               | <b>As</b>      | <b>Sb</b>       |                 |
| Control                                        | <sup>a</sup>                   | 5.4 $\pm$ 0.6  | 0.23 $\pm$ 0.02                                         | 0.5 $\pm$ 0.2  | 0.19 $\pm$ 0.05 |                 |
| HS1                                            | 50                             | 42.2 $\pm$ 0.3 | 40 $\pm$ 8                                              | 3.8 $\pm$ 0.7  | 0.66 $\pm$ 0.05 |                 |
| HS2                                            | 100                            | 71 $\pm$ 4     | 70 $\pm$ 1                                              | 4.4 $\pm$ 0.3  | 0.4 $\pm$ 0.2   |                 |
| HS3                                            | 150                            | 100 $\pm$ 15   | 100 $\pm$ 10                                            | 6 $\pm$ 1      | 0.29 $\pm$ 0.03 |                 |
| HS4                                            | 200                            | 160 $\pm$ 50   | 160 $\pm$ 30                                            | 12 $\pm$ 1     | 0.45 $\pm$ 0.2  |                 |
| HS5                                            | 250                            | 235 $\pm$ 60   | 150 $\pm$ 50                                            | 15 $\pm$ 3     | 0.54 $\pm$ 0.08 |                 |
| HS6                                            | 300                            | 270 $\pm$ 15   | 210 $\pm$ 80                                            | 42 $\pm$ 7     | 2 $\pm$ 1       |                 |
| HS7                                            | 400                            | 315 $\pm$ 35   | 410 $\pm$ 240                                           | 36 $\pm$ 10    | 1.5 $\pm$ 0.4   |                 |
| HS8                                            | 500                            | 520 $\pm$ 50   | 510 $\pm$ 100                                           | 47 $\pm$ 4     | 1.15 $\pm$ 0.06 |                 |
| HS9                                            | 600                            | 670 $\pm$ 220  | 670 $\pm$ 230                                           | 50 $\pm$ 7     | 1.32 $\pm$ 0.07 |                 |
| HS10                                           | 800                            | 950 $\pm$ 90   | 900 $\pm$ 80                                            | 73 $\pm$ 7     | 2.3 $\pm$ 0.3   |                 |
| HS11                                           | 1200                           | 1280 $\pm$ 70  | 1230 $\pm$ 80                                           | 90 $\pm$ 10    | 1.9 $\pm$ 0.5   |                 |
| HS12                                           | 1600                           | 1410 $\pm$ 90  | 1750 $\pm$ 170                                          | 126 $\pm$ 6    | 10 $\pm$ 4      |                 |
| HS13                                           | 2000                           | 2630 $\pm$ 150 | 2920 $\pm$ 240                                          | 160 $\pm$ 23   | 27 $\pm$ 9      |                 |
| HS14                                           | 3500                           | 4200 $\pm$ 200 | 5090 $\pm$ 500                                          | 726            | 348             |                 |
| <b>Recently contaminated soils (mg/kg)</b>     |                                |                |                                                         |                |                 |                 |
|                                                | <b>As</b>                      | <b>Sb</b>      | <b>As</b>                                               | <b>Sb</b>      | <b>As</b>       |                 |
| Control                                        | <sup>a</sup>                   | <sup>a</sup>   | 6 $\pm$ 0.3                                             | 0.3 $\pm$ 0.03 | 0.42 $\pm$ 0.07 | 0.7 $\pm$ 0.1   |
| RS1                                            | 40                             | 40             | 60 $\pm$ 10                                             | 35 $\pm$ 5     | 16 $\pm$ 2      | 0.62 $\pm$ 0.09 |
| RS2                                            | 80                             | 80             | 88 $\pm$ 3                                              | 56 $\pm$ 10    | 37 $\pm$ 24     | 1.0 $\pm$ 0.5   |
| RS3                                            | 160                            | 160            | 175 $\pm$ 2                                             | 130 $\pm$ 7    | 65 $\pm$ 10     | 1.9 $\pm$ 0.6   |
| RS4                                            | 200                            | 300            | 220 $\pm$ 7                                             | 240 $\pm$ 5    | 80 $\pm$ 7      | 4.4 $\pm$ 1.5   |
| RS5                                            | 300                            | 600            | 315 $\pm$ 5                                             | 250 $\pm$ 10   | 70 $\pm$ 15     | 8.9 $\pm$ 0.6   |
| RS6                                            | 400                            | 1500           | 405 $\pm$ 4                                             | 1250 $\pm$ 30  | 40 $\pm$ 7      | 100 $\pm$ 18    |

<sup>a</sup> Control soils.

**Supplementary Information 2-** Percentage hydration of water spinach in historically and recently contaminated soils.

**Table S2 (A).** Percentage hydration of water spinach roots and shoots in historically contaminated soils.

| Sample  | Root     |          |            | Shoot    |          |            |
|---------|----------|----------|------------|----------|----------|------------|
|         | Wet mass | Dry mass | % moisture | Wet mass | Dry mass | % moisture |
| Control | 4.33     | 0.78     | 82.09      | 47.19    | 4.21     | 91.08      |
| HS1     | 6.20     | 0.60     | 90.26      | 61.42    | 4.38     | 92.86      |
| HS2     | 5.12     | 0.73     | 85.74      | 34.34    | 3.34     | 90.26      |
| HS3     | 8.13     | 0.90     | 88.99      | 45.10    | 3.93     | 91.28      |
| HS4     | 5.58     | 0.55     | 90.18      | 38.13    | 3.05     | 91.99      |
| HS5     | 8.69     | 0.62     | 92.85      | 37.22    | 2.97     | 92.01      |
| HS6     | 9.73     | 0.91     | 90.66      | 49.43    | 4.54     | 90.82      |
| HS7     | 7.97     | 0.57     | 92.84      | 40.23    | 2.77     | 93.12      |
| HS8     | 7.90     | 0.69     | 91.31      | 41.15    | 2.94     | 92.86      |
| HS9     | 6.17     | 0.58     | 90.65      | 28.38    | 1.99     | 93.00      |
| HS10    | 4.53     | 0.40     | 91.15      | 19.66    | 1.27     | 93.53      |
| HS11    | 6.57     | 0.56     | 91.49      | 19.68    | 1.45     | 92.64      |
| HS12    | 4.07     | 0.28     | 93.08      | 19.31    | 1.41     | 92.72      |
| HS13    | 0.94     | 0.06     | 93.68      | 3.97     | 0.40     | 89.86      |
| HS14    | 0.51     | 0.02     | 96.66      | 1.11     | 0.08     | 92.71      |

**Table S2 (B).** Percentage hydration of water spinach roots and shoots in recently contaminated soils

| Sample  | Root     |                |                | Shoot    |          |                    |
|---------|----------|----------------|----------------|----------|----------|--------------------|
|         | Wet mass | Dry mass       | % moisture     | Wet mass | Dry mass | % moisture         |
| Control | 4.13     | 1.46           | 64.54          | 45.10    | 5.84     | 87.04              |
| RS1     | 1.49     | 0.88           | 40.93          | 39.17    | 2.72     | 93.05              |
| RS2     | 2.92     | 0.89           | 69.52          | 34.98    | 2.79     | 92.08              |
| RS3     | 3.89     | 1.07           | 72.49          | 30.23    | 2.75     | 90.93              |
| RS4     | 4.15     | 1.28           | 69.15          | 28.34    | 2.26     | 92.00              |
| RS5     | 3.11     | 1.00           | 67.84          | 16.08    | 1.62     | 89.93              |
| RS6     | 0.26     | - <sup>a</sup> | - <sup>a</sup> | 2.80     | 0.85     | 69.64 <sup>a</sup> |

<sup>a</sup> Measurement error

**Supplementary Information 3** The relationship of *I. aquatica* root and shoot dry mass and lengths with (A, C) total and (B, D) bioavailable concentrations in recently contaminated bioassay soils

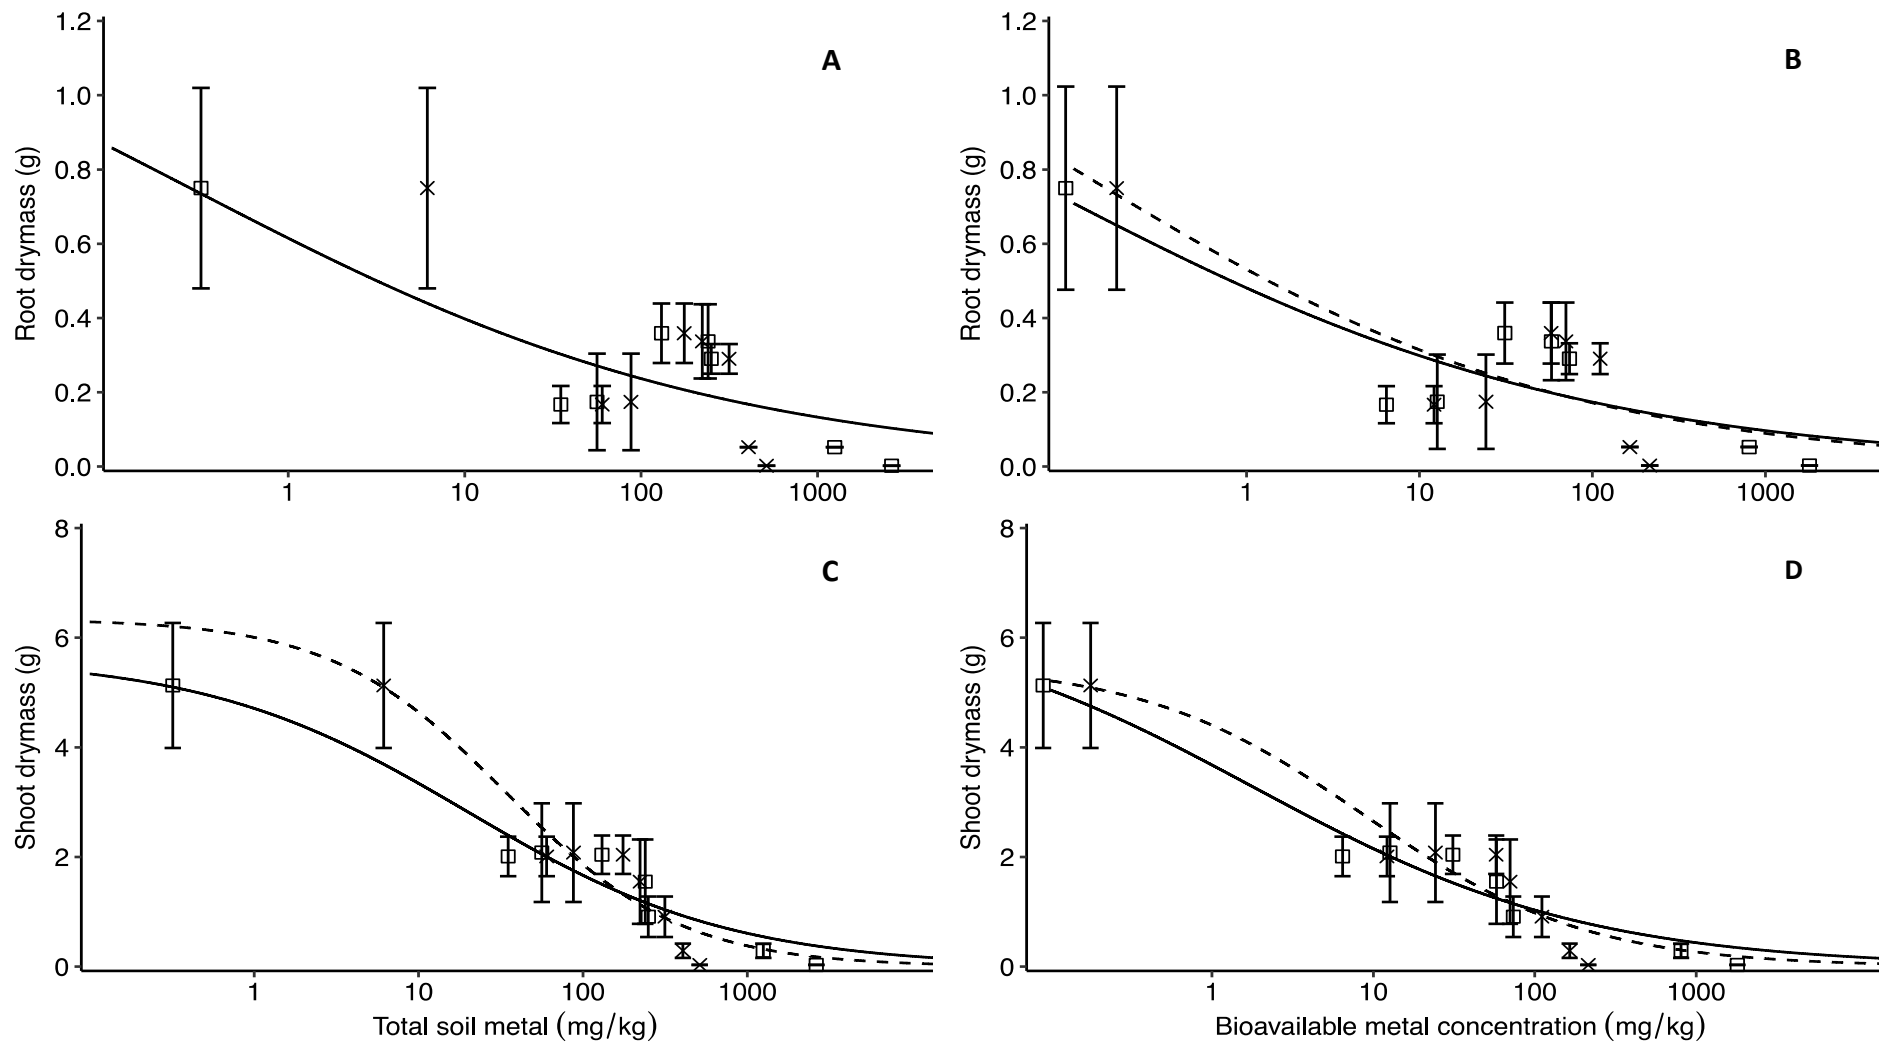

Figure S1. The relationship of *I. aquatica* root and shoot dry mass with (A, C) total and (B, D) bioavailable concentrations in recently contaminated bioassay soils. As (×, dashed line) and Sb (□, solid line). Dry mass reported as mean ± SE, n≥3.

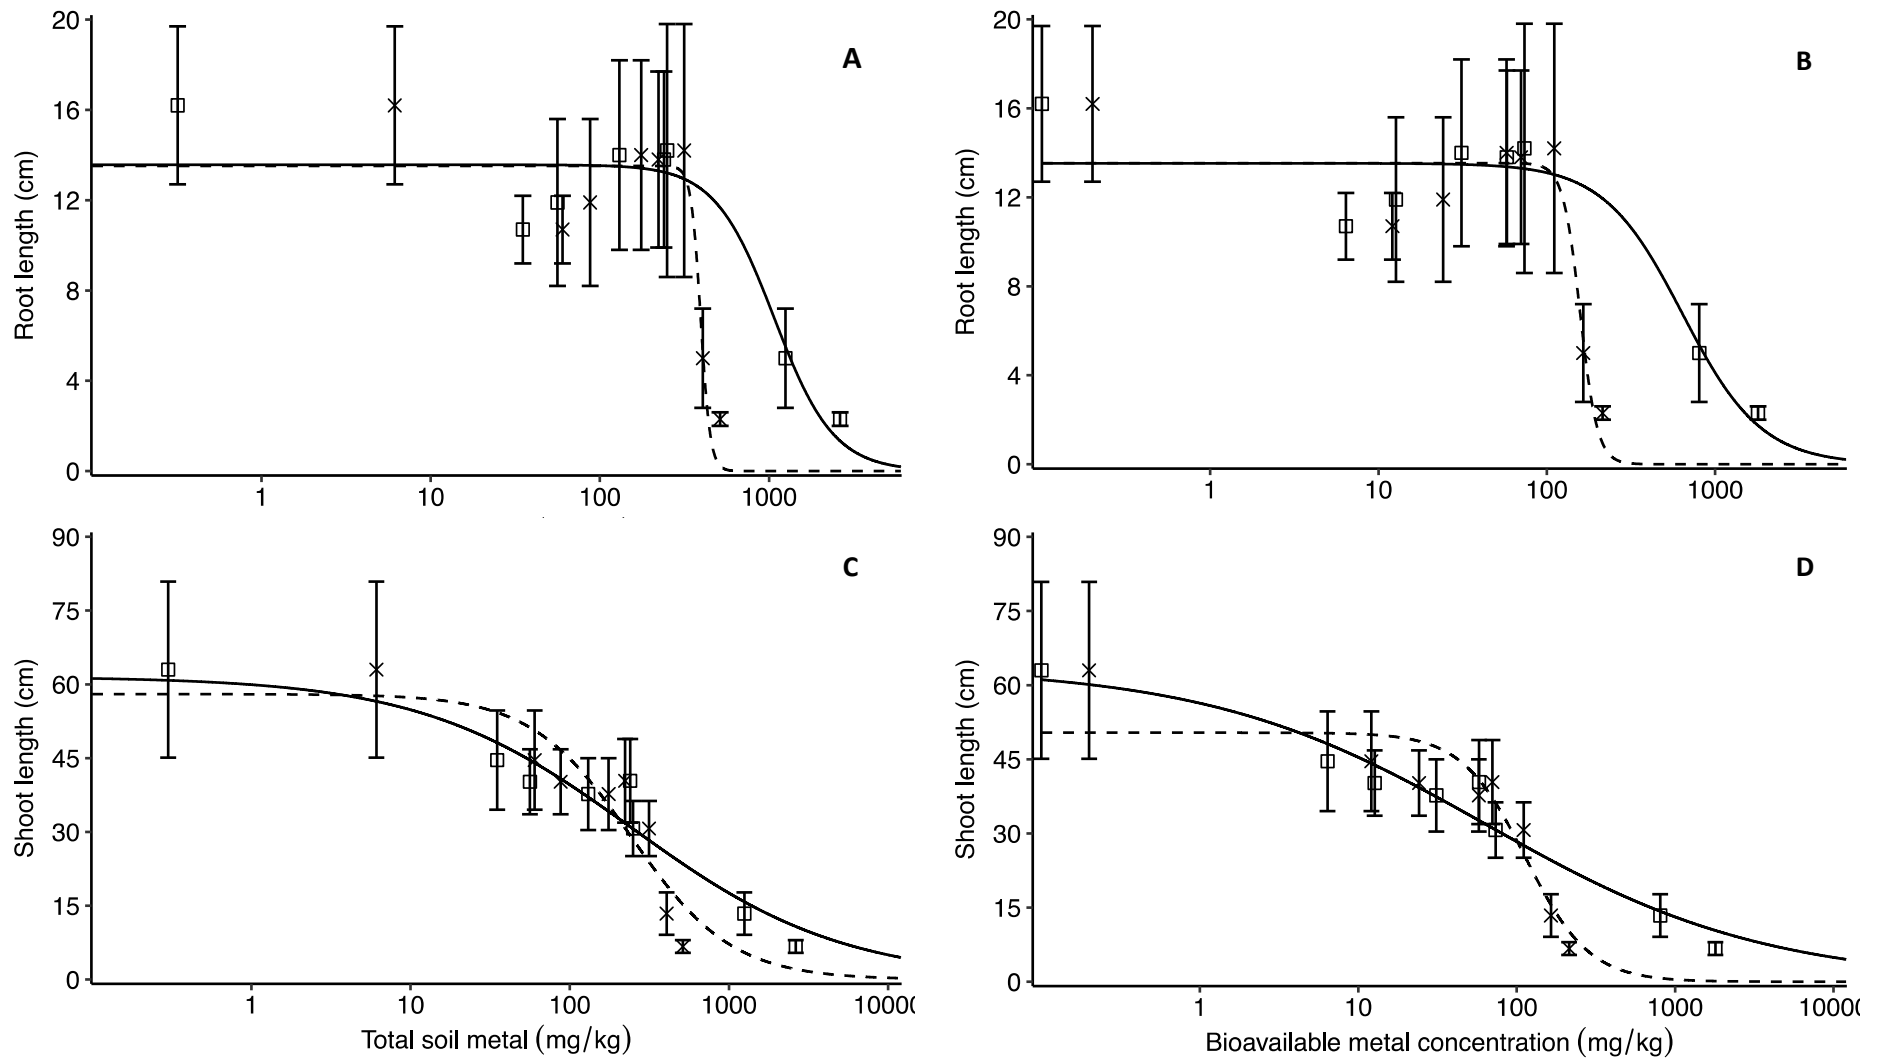

Figure S2. The relationship of *I. aquatica* root and shoot length with (A, C) total and (B, D) SEP-bioavailable concentrations in recently contaminated bioassay soils. As (x, dashed line) and Sb (□, solid line). Tissue length reported as mean  $\pm$  SE,  $n \geq 3$ .

**Supplementary Information 4.** Photosynthetic efficiency of water spinach (*I. aquatica*) following 30-day exposures to As and Sb in historically and recently contaminated soils

A).

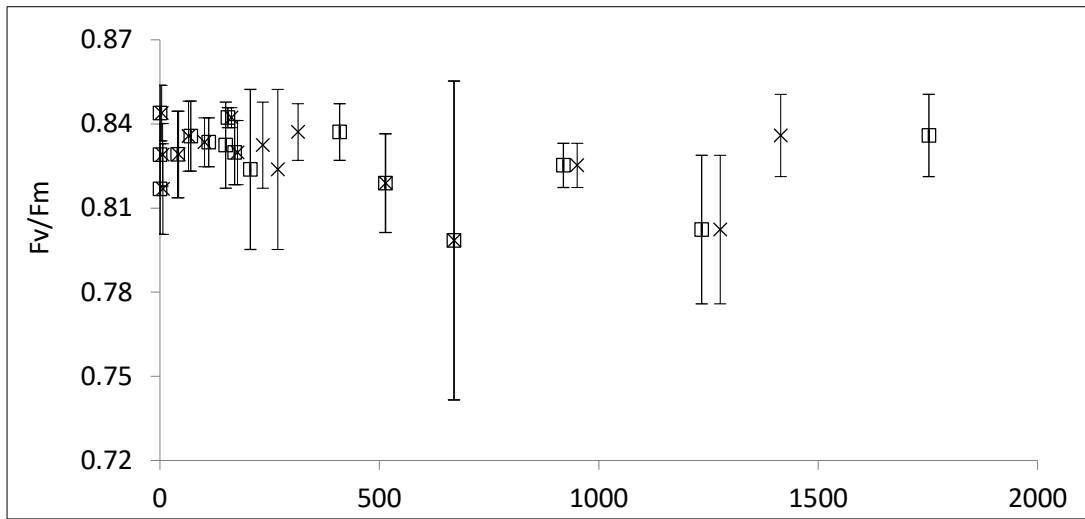

B).

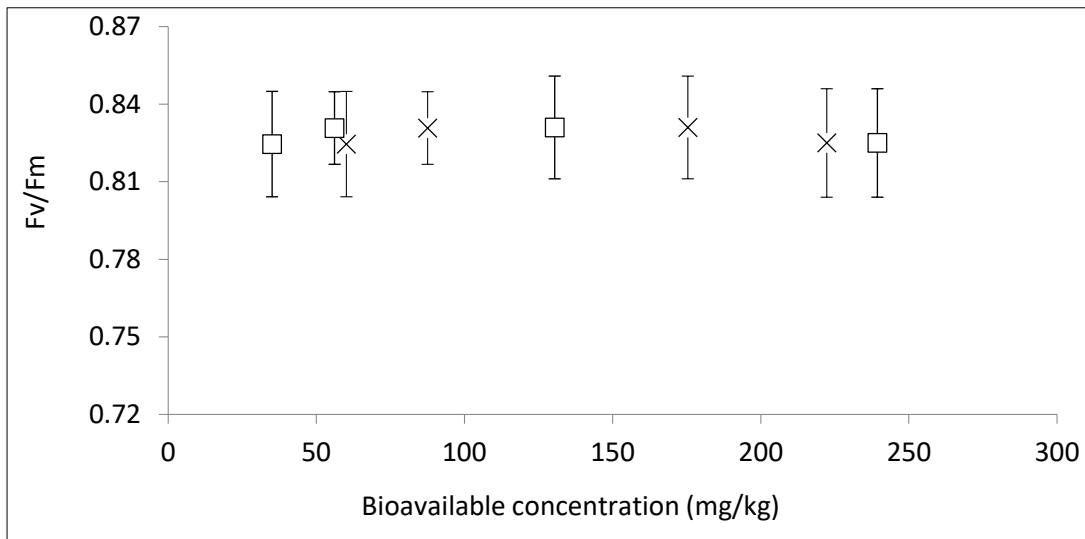

**Figure S3 .** Photosynthetic efficiency (Fv/Fm) of water spinach (*I. aquatica*), over increasing As (×) and Sb (□) concentrations (mg/kg) **A).** Historically and **B).** Recently contaminated soils
